# Supplementary material for: FAM87A as a Competing Endogenous RNA of miR-424-5p Suppresses Glioma Progression by Regulating PPM1H
Source: Hindawi journal article supplement (doi:10.1155/2021/7952922), 2021-10-18
Supplement: f2 [file 7952922.f2.docx]

**Supplementary Table 1 Correlation analysis of the expression level of FAM87A and pathological parameters in glioma tissue**

| Clinicopathologic factors | Cases (n) | FAM87A | | *P*  value |
| --- | --- | --- | --- | --- |
| Low expression | High  expression |
| Gender |  |  |  | 0.707 |
| Male | 46 | 25 | 21 |  |
| Female | 30 | 13 | 17 |  |
| Age |  |  |  | 0.466 |
| ≤60 | 43 | 20 | 23 |  |
| >60 | 33 | 18 | 15 |  |
| Tumor size |  |  |  |  |
| ≤2 cm | 40 | 19 | 21 | 0.483 |
| >2 cm | 36 | 20 | 16 |  |
| Tumor site |  |  |  | 0.358 |
| Pancreatic head | 40 | 22 | 18 |  |
| Pancreatic tail | 36 | 16 | 20 |  |
| Differentiation degree |  |  |  | 0.862 |
| Low differentiation | 43 | 21 | 22 |  |
| Medium differentiation | 22 | 12 | 10 |  |
| High differentiation | 11 | 5 | 6 |  |
| pathological stage |  |  |  | 0.003 |
| Ⅰ stage | 32 | 10 | 22 |  |
| Ⅱ stage | 27 | 14 | 13 |  |
| Ⅲ stage | 17 | 14 | 3 |  |
| Lymphatic metastasis |  |  |  | 0.007 |
| Yes | 35 | 22 | 13 |  |
| No | 41 | 13 | 28 |  |
