# Supplementary material for: FAM87A as a Competing Endogenous RNA of miR-424-5p Suppresses Glioma Progression by Regulating PPM1H
Source: Hindawi journal article supplement (doi:10.1155/2021/7952922), 2021-10-18
Supplement: f3 [file 7952922.f3.docx]

**Supplementary Table 2 Cell lines used in this study**

| Cell line | Cell type | Art No. | Source | Country |
| --- | --- | --- | --- | --- |
| HEB | Astrocytes | HEB09 | Chinese Academy of Sciences Cell Bank | Shanghai, China |
| T98G | Glioma cells | T98G49 | Chinese Academy of Sciences Cell Bank | Shanghai, China |
| A172 | Glioma cells | A172-67 | Chinese Academy of Sciences Cell Bank | Shanghai, China |
| SNB19 | Glioma cells | SNB19-90 | Chinese Academy of Sciences Cell Bank | Shanghai, China |
| U251 | Glioma cells | U251TZ | Chinese Academy of Sciences Cell Bank | Shanghai, China |
