# Supplementary material for: FAM87A as a Competing Endogenous RNA of miR-424-5p Suppresses Glioma Progression by Regulating PPM1H
Source: Hindawi journal article supplement (doi:10.1155/2021/7952922), 2021-10-18
Supplement: f4 [file 7952922.f4.docx]

**Supplementary Table 3 Primer sequences used in the study**

| **qPCR** | **sense sequence** | **anti-sense sequence** |
| --- | --- | --- |
| FAM87A | 5’-TCAGTCCCTGAAGAGTGCCT-3’ | 5’-CTCACTCCATGCCCCTTGTT-3’ |
| miR-424-5p | 5’-CAGCAGCAAUUCAUGUUUUGAA-3’ |  |
| PPM1H | 5’-TCTAATGACCGACTGGGCTC-3’ | 5’-GCCCATGAGGCCCTATGACA-3’ |
| U6 | 5’-CTCGCTTCGGCAGCACA-3’ | 5’-AACGCTTCACGAATTTGCGT-3’ |
| GAPDH | 5’-GGAGCGAGATCCCTCCAAAAT-3’ | 5’-GGCTGTTGTCATACTTCTCATGG-3’ |
| 36B4 | 5’-CAACCCAGCTCTGGAGAAAC-3’ | 5’-GTGAGGTCCTCCTTGGTGAA-3’ |
