# Supplementary material for: FAM87A as a Competing Endogenous RNA of miR-424-5p Suppresses Glioma Progression by Regulating PPM1H
Source: Hindawi journal article supplement (doi:10.1155/2021/7952922), 2021-10-18
Supplement: f5 [file 7952922.f5.docx]

| **Antibody** | **WB** | **Product code** | **Specificity** | **Company** |
| --- | --- | --- | --- | --- |
| N-cadherin | 1:1000 | ab76057 | Rabbit Polyclonal | Abcam, China |
| E-cadherin | 1:1000 | ab15148 | Rabbit Polyclonal | Abcam, China |
| Vimentin | 1:2000 | ab137321 | Rabbit Polyclonal | Abcam, China |
| MMP-2 | 1 µg/ml | ab37150 | Rabbit Polyclonal | Abcam, China |
| MMP-9 | 1:1000 | ab38898 | Rabbit Polyclonal | Abcam, China |
| Fibronection | 1:1000 | ab2413 | Rabbit Polyclonal | Abcam, China |
| PPM1H | 1 mg/ml | IC218473 | Rabbit Polyclonal | Lifespan,USA |
| p-Akt | 1:2000 | 4060 | Rabbit | CST, USA |
| Akt | 1:1000 | 9272 | Rabbit | CST, USA |
| p-PI3K | 1:1000 | 17366 | Rabbit | CST, USA |
| PI3K | 1:1000 | 4257 | Rabbit | CST, USA |
| GAPDH | 1:1000 | ab9485 | Rabbit Polyclonal | Abcam, China |
| IgG | / | ab6721 | Goat anti Rabbit | Abcam, China |
| **Antibody** | **IHC** | **Product code** | **Specificity** | **Company** |
| PPM1H | 1 mg/ml | IC218473 | Rabbit Polyclonal | immunoclone, USA |
| Ki-67 | 1:150 | ab15580 | Rabbit monoclonal | Abcam, China |
| IgG | / | ab6721 | Goat anti Rabbit | Abcam, China |

**Supplementary Table 4 Antibodies used in the study**
