# Supplementary figures and images for: FAM87A as a Competing Endogenous RNA of miR-424-5p Suppresses Glioma Progression by Regulating PPM1H
Source: Hindawi journal article supplement (doi:10.1155/2021/7952922), 2021-10-18

**A**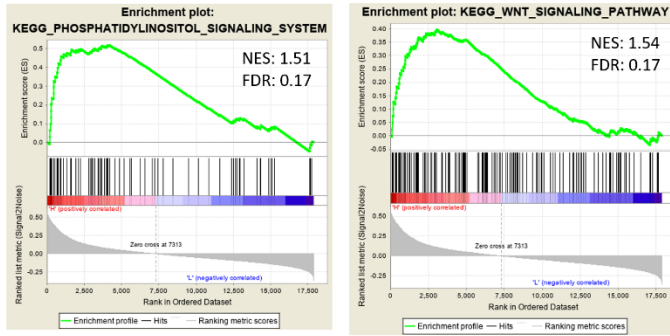**B**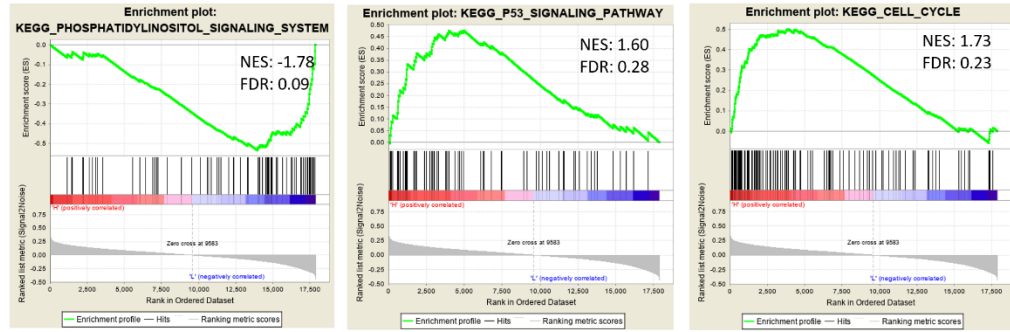**C**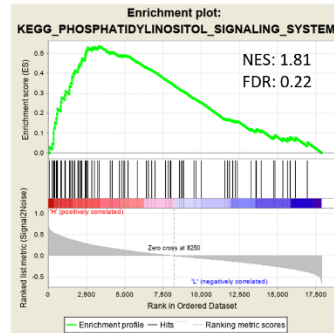

Supplement: f1 [file 7952922.f1.pdf]
